# Supplementary material
Source: publisher site journal article supplement (https://en-cdn.bio-protocol.org/attached/file/20200820/3739%20Supplementary%20file%20Table%20(Recipes).docx)
Supplement: Supplementary file 1 [file 3739%20Supplementary%20file%20Table%20(Recipes).docx]

**Recipes**

**Table S1. Rice soil composition**

| Rice soil = Profile Porous Ceramic (PPC) Greens Grade: Arabidopsis soil with a ratio = 1:1 | |
| --- | --- |
| Arabidopsis Soil = (B400: Woodfiber : Floranton = 2:3:1) + 0.1 g/L Radigen+ 1 g/L Dolomite chalk | |
| Profile Porous Ceramic (PPC) Greens Grade | <http://www.profileevs.com/products/soil-amendments/profile-porous-ceramic-ppc> |
| B400 + Cocopor, Stender | <https://www.stender.de/en-GB/product/18/b-400-mit-cocopor> |
| Substrate woodfiber, Stender | <https://www.stender.de/en-GB/raw-materials-in-the-spotight> |
| Floranton 1, Floragard | <https://www.floragard.de/de-de/webshop/237/floragard-floraton-3> |
| 0.1 g/L Radigen® | <https://www.terraflor.de/spurennaehrstoff-mischduenger/radigen> |
| 1 g/L Dolomite chalk | <https://www.euflor.de/de-de/sortiment/produkt/285/magnesiumkalk-dolomit> |

**Table S2. Stock solution composition**

| **Stock solution** | **Components** | **Weight** | **Unit** | **Molarity** | **Recommended volume** |
| --- | --- | --- | --- | --- | --- |
| N6 major 1 | KNO3 | 141.5 | g/L | 1.4 M | 1 L |
| N6 major 2 | MgSO4·7 H2O | 18.5 | g/L | 0.0751 M | 1 L |
| (NH4)2SO4 | 46.3 | g/L | 0.35 M |
| N6 major 3 | KH2PO4 | 40 | g/L | 0.294 M | 1 L |
| N6 major 4 | CaCl2·2H2O | 16.6 | g/L | 0.113 M | 1 L |
| B5 minor 1 | FeSO4·7H2O | 2.79 | g/L | 0.01 M | 1 L |
| Na2EDTA·2H2O | 3.73 | g/L | 0.01 M |
| B5 minor 2 | MnSO4·H2O | 0.75 | g/L | 4.44 mM | 1 L |
| ZnSO4·7H2O | 0.2 | g/L | 0.669 mM |
| H3BO3 | 0.3 | g/L | 4.85 mM |
| B5 minor 3 | KI | 75 | mg/L | 0.452 M | 1 L |
| B5 minor 4 | CuSO4·5H2O | 2.5 | mg/L | 0.01 M | 1 L |
| Na2MoO4·2H2O | 25 | mg/L | 0.103 M |
| CoCl2·6H2O | 2.5 | mg/L | 0.105 M |
| B5 vitamins | Thiamine HCl | 2 | g/L | 5.93 M | 0.1 L |
| Pyridoxine HCl | 200 | mg/L | 0.973 M |
| Nicotinic acid | 200 | mg/L | 1.62 M |
| Myo-inositol | 20 | g/L | 111 mM |
| AA macro salts | CaCl2·2H2O | 1.5 | g/L | 10.2 mM | 1 L |
| MgSO4·7H2O | 2.49 | g/L | 10.1 mM |
| NaH2PO4 | 1.31 | g/L | 10.9 mM |
| KCl | 29.5 | g/L | 0.396 M |
| AA micro salts | CoCl2·6H2O | 25 | mg/L | 0.105 M | 1 L |
| CuSO4·5H2O | 25 | mg/L | 0.1 M |
| H3BO3 | 3 | g/L | 48.5 mM |
| KI | 750 | mg/L | 4.52 M |
| MnSO4·H2O | 9.96 | mg/L | 58.9 mM |
| Na2MoO4·2H2O | 250 | mg/L | 1.03 M |
| ZnSO4·7H2O | 2 | g/L | 6.96 mM |
| Glycine | NH2CH2COOH | 7.5 | g/L | 99.9 mM | 1 L |
| MS 1 | KNO3 | 95 | g/L | 0.940 M | 1 L |
| NH4NO3 | 82.5 | g/L | 1.03 M |
| MS 2 | MgSO4·7H2O | 65 | g/L | 0.264 M | 1 L |
| MnSO4·H2O | 1.69 | g/L | 100 mM |
| ZnSO4·7H2O | 0.86 | g/L | 2.99 mM |
| CuSO4·5H2O | 2.5 | mg/L | 100 mM |

**Table S2.** Continued

| MS 3 | CaCl2·2H2O | 44 | g/L | 2.99 mM | 1 L |
| --- | --- | --- | --- | --- | --- |
| KI | 83 | mg/L | 0.5 M |
| CoCl2·6H2O | 2.5 | mg/L | 10.5 mM |
| MS 4 | KH2PO4 | 17 | g/L | 0.125 M | 1 L |
| H3BO3 | 0.62 | g/L | 10 mM |
| Na2MoO4·2H2O | 25 | mg/L | 0.103 M |
| MS Vitamins | Nicotinic acid | 100 | mg/L | 0.812 M | 0.1 L |
|  | Pyridoxine HCl | 100 | mg/L | 0.486 M |  |
| Thiamine HCl | 20 | mg/L | 59.3 mM |
| Glycine | 400 | mg/L | 5.33 M |
| Myo-inositol | 20 | g/L | 0.111 M |

**Table S3. Phytohormones and antibiotics**

| **Component** | **Concentration** | **Recommended volume** | **Note** |
| --- | --- | --- | --- |
| BAP | 1 mg/ml | 10 ml | Dissolve in 1 N NaOH, fill up with MilliQ water to final volume and filter sterilize |
| 2.4-D | 1 mg/ml | 50 ml | Dissolve in 1 M KOH, fill up with MilliQ water to final volume and filter sterilize |
| Kinetin | 1 mg/ml | 25 ml | Dissolve in 1 N NaOH, fill up with MilliQ water to final volume and filter sterilize |
| NAA | 1 mg/ml | 20 ml | Dissolve in 1 N NaOH, fill up with MilliQ water to final volume and filter sterilize |
| Carbenicillin | 100 mg/ml | 10 ml | Dissolve in MilliQ water and fill up to final volume. filter sterilize |
| Cefotaxime sodium | 100 mg/ml | 50 ml | Dissolve in MilliQ water and fill up to final volume and filter sterilize |
| Hygromycin B | 50 mg/ml | - | Use directly from the 50 mg/ml stock |

**Table S4. Cultivation medium composition**

| **Components** | **Unit** | **Resuspension** | **Co-cultivation** | **Resting** | **Selection** | **Pre-regeneration** | **Regeneration** | **Rooting** |
| --- | --- | --- | --- | --- | --- | --- | --- | --- |
| **Res** | **Co** | **Res** | **Sel** | **Pre** | **Reg** | **Roo** |
| MS1 | ml/L | - | - | - | - | 20 | 20 | 20 |
| MS2 | ml/L | - | - | - | - | 10 | 10 | 10 |
| MS3 | ml/L | - | - | - | - | 10 | 10 | 10 |
| MS4 | ml/L | - | - | - | - | 10 | 10 | 10 |
| MS Vitamins | ml/L | - | - | - | - | 5 | 5 | 5 |
| N6 major 1 | ml/L | - | 20 | 20 | 20 | - | - | - |
| N6 major 2 | ml/L | - | 10 | 10 | 10 | - | - | - |
| N6 major 3 | ml/L | - | 10 | 10 | 10 | - | - | - |
| N6 major 4 | ml/L | - | 10 | 10 | 10 | - | - | - |
| B5 minor 1 | ml/L | 10 | 10 | 10 | 10 | 10 | 10 | 10 |
| B5 minor 2 | ml/L | - | 10 | 10 | 10 | - | - | - |
| B5 minor 3 | ml/L | - | 10 | 10 | 10 | - | - | - |
| B5 minor 4 | ml/L | - | 10 | 10 | 10 | - | - | - |
| B5 Vitamins | ml/L | 1 | 5 | 5 | 5 | - | - | - |
| AA macro salts | ml/L | 100 | - | - | - | - | - | - |
| AA micro salts | ml/L | 1 | - | - | - | - | - | - |
| Glycine | ml/L | 1 | - | - | - | - | - | - |
| L-Glutamine | mg/L | 876 | - | - | - | - | - | - |
| Aspartic acid | mg/L | 260 | - | - | - | - | - | - |
| Arginine | mg/L | 174 | - | - | - | - | - | - |
| Casaminoacid | mg/L | 500 | 500 | 500 | 500 | - | - | - |
| L-Proline | mg/L | - | 500 | 500 | 500 | - | - | - |
| Sucrose | g/L | 20 | 20 | - | - | - | 30 | 30 |
| D-Glucose | g/L | 10 | 10 | - | - | - | - | - |
| Mannitol | g/L | - | - | 36 | 36 | - | - | - |
| Maltose | g/L | - | - | 20 | 20 | 30 | - | - |
| Sorbitol | g/L | - | - | - | - | 20 |  | - |
| 2.4 -D * | mg/L | - | 2 | 1 | 1 | - | - | - |
| NAA * | mg/L | - | 1 | 1 | 1 | 5 | 1 | - |
| BAP * | mg/L | - | 1 | 0.2 | 0.2 | - | - | - |
| Kinetin * | mg/L | - | - | - | - | 2 | 2 | - |
| pH |  | 5.2 | 5.2 | 5.8 | 5.8 | 5.8 | 5.8 | 5.8 |
| Agarose Type 1 | g/L | - | 5.5 | - | - | 10 | - | - |
| Gelrite | g/L | - | - | 5 | 5 | - | 3 | 2 |
| acetosyringone 100 µM* | mg/L | 19.62 | 19.62 | - | - | - | - | - |
| Cefotaxime* | mg/L | - | - | 250 | 250 | 250 | 250 | - |
| Carbenicillin* | mg/L | - | - | 100 | 100 | - | - | - |
| Hygromycin B* | mg/L | - | - | - | 30 | 30 | 30 | - |
| Petri dish size |  |  | Normal | Normal | Normal | Deep | Extra deep | MagentaTM GA7 vessels |
| Volume of media per Petri dish |  |  | 35 ml | 35 ml | 35 ml | 35 ml | 35 ml | 50 ml |

*Add after autoclaving 40-45 °C

Add acetosyringone just before use

**Table S5. Suspension medium**

| Prepared by: Date: | | | | | | | |  | | |  | | |  | | |  | |  | |
| --- | --- | --- | --- | --- | --- | --- | --- | --- | --- | --- | --- | --- | --- | --- | --- | --- | --- | --- | --- | --- |
| **Components** | | **Unit** | | **1 L** | | **750 ml** | | | **500 ml** | | | **250 ml** | | | | **100 ml** | | **50 ml** | |
| B5 minor 1 | | ml | | 10 | | 7.5 | | | 5 | | | 2.5 | | | | 1 | | 0.5 | |
| B5 Vitamins | | ml | | 1 | | 0.75 | | | 0.5 | | | 0.25 | | | | 0.1 | | 0.05 | |
| AA macro salts | | ml | | 100 | | 75 | | | 50 | | | 25 | | | | 10 | | 5 | |
| AA micro salts | | ml | | 1 | | 0.75 | | | 0.5 | | | 0.25 | | | | 0.1 | | 0.05 | |
| Glycine | | ml | | 1 | | 0.75 | | | 0.5 | | | 0.25 | | | | 0.1 | | 0.05 | |
| L-Glutamine | | mg | | 876 | | 657 | | | 438 | | | 219 | | | | 87.6 | | 43.8 | |
| Aspartic acid | | mg | | 260 | | 195 | | | 130 | | | 65 | | | | 26 | | 13 | |
| Arginine | | mg | | 174 | | 130.5 | | | 87 | | | 43.5 | | | | 17.4 | | 8.7 | |
| Casamino acids | | mg | | 500 | | 375 | | | 250 | | | 125 | | | | 50 | | 25 | |
| Sucrose | | g | | 20 | | 15 | | | 10 | | | 5 | | | | 2 | | 1 | |
| D-Glucose | | g | | 10 | | 7.5 | | | 5 | | | 2.5 | | | | 1 | | 0.5 | |
| acetosyringone  100 µM *** | | mg | | 19.62 | | 14.715 | | | 9.81 | | | 4.905 | | | | 1.962 | | 0.981 | |
| Adjust pH to 5.2 using NaOH 1N | | | | | | | | | | | | | | | | | | | |
| Temperature: |  | |  | |  | | Start pH: | | |  | | |  | | Final pH: | | | | |  | |
| FILTER STERILE | | | | | | | | | | | | | | | | | | | |
| ******* Add acetosyringone just before use!  **Dissolve acetosyringone**: for 50 ml suspension culture, dissolve 10 mg acetosyringone in 100 μl DMSO. Then take 9.81 μl of the solution to obtain 0.981 mg acetosyringone; filter sterilization of acetosyringone is not needed. | | | | | | | | | | | | | | | | | | | |

**Table S6. Co-cultivation medium**

Prepared by: Date:

| **Components** | **Unit** | **2 L** | | **1.5 L** | **1 L** | | **750 ml** | | **500 ml** | **250 ml** | |
| --- | --- | --- | --- | --- | --- | --- | --- | --- | --- | --- | --- |
| N6 major 1 | ml | 40 | | 30 | 20 | | 15 | | 10 | 5 | |
| N6 major 2 | ml | 20 | | 15 | 10 | | 7.5 | | 5 | 2.5 | |
| N6 major 3 | ml | 20 | | 15 | 10 | | 7.5 | | 5 | 2.5 | |
| N6 major 4 | ml | 20 | | 15 | 10 | | 7.5 | | 5 | 2.5 | |
| B5 minor 1 | ml | 20 | | 15 | 10 | | 7.5 | | 5 | 2.5 | |
| B5 minor 2 | ml | 20 | | 15 | 10 | | 7.5 | | 5 | 2.5 | |
| B5 minor 3 | ml | 20 | | 15 | 10 | | 7.5 | | 5 | 2.5 | |
| B5 minor 4 | ml | 20 | | 15 | 10 | | 7.5 | | 5 | 2.5 | |
| B5 Vitamins | ml | 10 | | 7.5 | 5 | | 3.75 | | 2.5 | 1.25 | |
| Casaminoacid | mg | 1000 | | 750 | 500 | | 375 | | 250 | 125 | |
| L-Proline | mg | 1000 | | 750 | 500 | | 375 | | 250 | 125 | |
| Sucrose | g | 40 | | 30 | 20 | | 15 | | 10 | 5 | |
| D-Glucose | g | 20 | | 15 | 10 | | 7.5 | | 5 | 2.5 | |
| 2.4 -D (1 mg/ml) | ml | 4 | | 3 | 2 | | 1.5 | | 1 | 0.5 | |
| NAA (1 mg/ml) | ml | 2 | | 1.5 | 1 | | 0.75 | | 0.5 | 0.25 | |
| BAP (1 mg/ml) | ml | 2 | | 1.5 | 1 | | 0.75 | | 0.5 | 0.25 | |
| Agarose Type 1 | g | 11 | | 8.25 | 5.5 | | 4.125 | | 2.75 | 1.375 | |
| acetosyringone  (100 µM) | mg | 39.24 | | 29.43 | 19.62 | | 14.715 | | 9.81 | 4.905 | |
| Adjust pH to 5.2 using 1N NaOH | | | | | | | | | |
| Temperature: |  | | Start pH: | | | | | Final pH: | | |
| AUTOCLAVE | | | | | | | |
| Add after autoclaving 40-45 °C | | | | | |  | | | |
| Pour 35 ml medium into Normal Petri dish | | | | | | | | | |

**Table S7. Resting medium**

Prepared by: Date:

| **Components** | | **Unit** | **2 L** | | **1.5 L** | **1 L** | **750 ml** | | | **500 ml** | **250 ml** | |
| --- | --- | --- | --- | --- | --- | --- | --- | --- | --- | --- | --- | --- |
| N6 major 1 | | ml | 40 | | 30 | 20 | 15 | | | 10 | 5 | |
| N6 major 2 | | ml | 20 | | 15 | 10 | 7.5 | | | 5 | 2.5 | |
| N6 major 3 | | ml | 20 | | 15 | 10 | 7.5 | | | 5 | 2.5 | |
| N6 major 4 | | ml | 20 | | 15 | 10 | 7.5 | | | 5 | 2.5 | |
| B5 minor 1 | | ml | 20 | | 15 | 10 | 7.5 | | | 5 | 2.5 | |
| B5 minor 2 | | ml | 20 | | 15 | 10 | 7.5 | | | 5 | 2.5 | |
| B5 minor 3 | | ml | 20 | | 15 | 10 | 7.5 | | | 5 | 2.5 | |
| B5 minor 4 | | ml | 20 | | 15 | 10 | 7.5 | | | 5 | 2.5 | |
| B5 Vitamins | | ml | 10 | | 7.5 | 5 | 3.75 | | | 2.5 | 1.25 | |
| Casaminoacid | | mg | 1000 | | 750 | 500 | 375 | | | 250 | 125 | |
| L-Proline | | mg | 1000 | | 750 | 500 | 375 | | | 250 | 125 | |
| Mannitol | | g | 72 | | 54 | 36 | 27 | | | 18 | 9 | |
| Maltose | | g | 40 | | 30 | 20 | 15 | | | 10 | 5 | |
| 2.4 -D (1 mg/ml) | | ml | 2 | | 1.5 | 1 | 0.75 | | | 0.5 | 0.25 | |
| NAA (1 mg/ml) | | ml | 2 | | 1.5 | 1 | 0.75 | | | 0.5 | 0.25 | |
| BAP (1 mg/ml) | | ml | 0.4 | | 0.3 | 0.2 | 0.15 | | | 0.1 | 0.05 | |
| Gelrite | | g | 10 | | 7.5 | 5 | 3.75 | | | 2.5 | 1.25 | |
| Cefotaxime  (100 mg/ml) | | ml | 5 | | 3.75 | 2.5 | 1.875 | | | 1.25 | 0.625 | |
| Carbenicillin  (100 mg/ml) | | ml | 2 | | 1.5 | 1 | 0.75 | | | 0.5 | 0.25 | |
| Adjust pH to 5.8 using 1N NaOH | | | | | | | | | | | |
| Temperature: |  | | | Start pH: | | | | | Final pH: | | |
| AUTOCLAVE | | | | | | | | | | | |
| Add after autoclaving 40-45 °C | | | | | | | |  | | | |
| Pour 35 ml medium into Normal Petri dish | | | | | | | | | | | |

**Table S8. Selection medium**

Prepared by: Date:

| **Components** | | **Unit** | **2 L** | **1.5 L** | | **1 L** | | **750 ml** | | **500 ml** | **250 ml** |
| --- | --- | --- | --- | --- | --- | --- | --- | --- | --- | --- | --- |
| N6 major 1 | | ml | 40 | 30 | | 20 | | 15 | | 10 | 5 |
| N6 major 2 | | ml | 20 | 15 | | 10 | | 7.5 | | 5 | 2.5 |
| N6 major 3 | | ml | 20 | 15 | | 10 | | 7.5 | | 5 | 2.5 |
| N6 major 4 | | ml | 20 | 15 | | 10 | | 7.5 | | 5 | 2.5 |
| B5 minor 1 | | ml | 20 | 15 | | 10 | | 7.5 | | 5 | 2.5 |
| B5 minor 2 | | ml | 20 | 15 | | 10 | | 7.5 | | 5 | 2.5 |
| B5 minor 3 | | ml | 20 | 15 | | 10 | | 7.5 | | 5 | 2.5 |
| B5 minor 4 | | ml | 20 | 15 | | 10 | | 7.5 | | 5 | 2.5 |
| B5 Vitamins | | ml | 10 | 7.5 | | 5 | | 3.75 | | 2.5 | 1.25 |
| Casamino acids | | mg | 1000 | 750 | | 500 | | 375 | | 250 | 125 |
| L-Proline | | mg | 1000 | 750 | | 500 | | 375 | | 250 | 125 |
| Mannitol | | g | 72 | 54 | | 36 | | 27 | | 18 | 9 |
| Maltose | | g | 40 | 30 | | 20 | | 15 | | 10 | 5 |
| 2.4 -D (1 mg/ml) | | ml | 2 | 1.5 | | 1 | | 0.75 | | 0.5 | 0.25 |
| NAA (1 mg/ml) | | ml | 2 | 1.5 | | 1 | | 0.75 | | 0.5 | 0.25 |
| BAP (1 mg/ml) | | ml | 0.4 | 0.3 | | 0.2 | | 0.15 | | 0.1 | 0.05 |
| Kinetin (1 mg/ml) | | ml |  |  | |  | |  | |  |  |
| Gelrite | | g/L | 10 | 7.5 | | 5 | | 3.75 | | 2.5 | 1.25 |
| Cefotaxime  (100 mg/ml) | | ml | 5 | 3.75 | | 2.5 | | 1.875 | | 1.25 | 0.625 |
| Carbenicillin  (100 mg/ml) | | ml | 2 | 1.5 | | 1 | | 0.75 | | 0.50 | 0.25 |
| Hygromycin B (Roth, 50 mg/ml) | | ml | 1.2 | 0.9 | | 0.6 | | 0.45 | | 0.30 | 0.15 |
| Adjust pH to 5.8 using 1N NaOH | | | | | | | | | | |
| Temperature: |  | | | | Start pH: | | | | Final pH: | |
| AUTOCLAVE | | | | | | | | | | |
| Add after autoclaving 40-45 °C | | | | | | |  | | | |
| Pour 35 ml medium into Normal Petri dish | | | | | | | | | | |

**Table S9. Pre-regeneration medium**

Prepared by: Date:

| **Components** | | **Unit** | **2 L** | **1.5 L** | | **1 L** | | **750 ml** | | **500 ml** | **250 ml** |
| --- | --- | --- | --- | --- | --- | --- | --- | --- | --- | --- | --- |
| MS1 | | ml | 40 | 30 | | 20 | | 15 | | 10 | 5 |
| MS2 | | ml | 20 | 15 | | 10 | | 7.5 | | 5 | 2.5 |
| MS3 | | ml | 20 | 15 | | 10 | | 7.5 | | 5 | 2.5 |
| MS4 | | ml | 20 | 15 | | 10 | | 7.5 | | 5 | 2.5 |
| MS Vitamins | | ml | 10 | 7.5 | | 5 | | 3.75 | | 2.5 | 1.25 |
| B5 minor 1 | | ml | 20 | 15 | | 10 | | 7.5 | | 5 | 2.5 |
| Maltose | | g | 60 | 45 | | 30 | | 22.5 | | 15 | 7.5 |
| Sorbitol | | g | 40 | 30 | | 20 | | 15 | | 10 | 5 |
| NAA (1 mg/ml) | | ml | 10 | 7.5 | | 5 | | 3.75 | | 2.5 | 1.25 |
| Kinetin (1 mg/ml) | | ml | 4 | 3 | | 2 | | 1.5 | | 1 | 0.5 |
| Agarose Type 1 | | g | 20 | 15 | | 10 | | 7.5 | | 5 | 2.5 |
| Cefotaxime  (100 mg/ml) | | ml | 5 | 3.75 | | 2.5 | | 1.875 | | 1.25 | 0.625 |
| Hygromycin B (Roth, 50 mg/ml) | | ml | 1.2 | 0.9 | | 0.6 | | 0.45 | | 0.3 | 0.15 |
| Adjust pH to 5.8 using 1N NaOH | | | | | | | | | | |
| Temperature: |  | | | | Start pH: | | | | Final pH: | |
| AUTOCLAVE | | | | | | | | | | |
| Add after autoclaving 40-45 °C | | | | | | |  | | | |
| Pour 35 ml medium into Deep Petri dish | | | | | | | | | | |

**Table S10. Regeneration medium**

Prepared by: Date:

| **Components** | **Unit** | **2 L** | **1.5 L** | | **1 L** | **750 ml** | **500 ml** | | **250 ml** |
| --- | --- | --- | --- | --- | --- | --- | --- | --- | --- |
| MS1 | ml | 40 | 30 | | 20 | 15 | 10 | | 5 |
| MS2 | ml | 20 | 15 | | 10 | 7.5 | 5 | | 2.5 |
| MS3 | ml | 20 | 15 | | 10 | 7.5 | 5 | | 2.5 |
| MS4 | ml | 20 | 15 | | 10 | 7.5 | 5 | | 2.5 |
| MS Vitamins | ml | 10 | 7.5 | | 5 | 3.75 | 2.5 | | 1.25 |
| B5 minor 1 | ml | 20 | 15 | | 10 | 7.5 | 5 | | 2.5 |
| Sucrose | g | 60 | 45 | | 30 | 22.5 | 15 | | 7.5 |
| NAA (1 mg/ml) | ml | 2 | 1.5 | | 1 | 0.75 | 0.5 | | 0.25 |
| Kinetin (1 mg/ml) | ml | 4 | 3 | | 2 | 1.5 | 1 | | 0.5 |
| Gelrite | g | 6 | 4.5 | | 3 | 2.25 | 1.5 | | 0.75 |
| Cefotaxime (100 mg/ml) | ml | 5 | 3.75 | | 2.5 | 1.875 | 1.250 | | 0.625 |
| Hygromycin B (Roth, 50 mg/ml) | ml | 1.2 | 0.9 | | 0.60 | 0.45 | 0.30 | | 0.15 |
| Adjust pH to 5.8 using 1N NaOH |
| Temperature: |  | | | Start pH: | | | | Final pH: | | |
| AUTOCLAVE |
| Add after autoclaving 40-45 °C |  | | | |
| Pour 35 ml medium into Deep Petri dish |

**Table S11. Rooting medium**

Prepared by: Date:

| **Components** | **Unit** | | **2 L** | **1.5 L** | **1 L** | | **750 ml** | | **500 ml** | | **250 ml** |
| --- | --- | --- | --- | --- | --- | --- | --- | --- | --- | --- | --- |
| MS1 | ml | | 40 | 30 | 20 | | 15 | | 10 | | 5 |
| MS2 | ml | | 20 | 15 | 10 | | 7.5 | | 5 | | 2.5 |
| MS3 | ml | | 20 | 15 | 10 | | 7.5 | | 5 | | 2.5 |
| MS4 | ml | | 20 | 15 | 10 | | 7.5 | | 5 | | 2.5 |
| MS Vitamins | ml | | 10 | 7.5 | 5 | | 3.75 | | 2.5 | | 1.25 |
| B5 minor 1 | ml | | 20 | 15 | 10 | | 7.5 | | 5 | | 2.5 |
| Sucrose | g | | 60 | 45 | 30 | | 22.5 | | 15 | | 7.5 |
| Gelrite | g | | 4 | 3 | 2 | | 1.5 | | 1 | | 0.5 |
| Adjust pH to 5.8 using 1N NaOH | | | | | | | | | |
|  | | Start pH: | | | | | | Final pH: | | | |
| AUTOCLAVE | | | | | | | | | |
| Add after autoclaving 40-45 °C | | | | | |  | | | |
| Pour 50 ml medium into Magenta box. | | | | | | | | | |

**Table S12. Transformation cheat sheet**

| Variety:  From: | | | Harvest on:  Germination on: | | *Agrobacterium* strain:  Construct: | | |
| --- | --- | --- | --- | --- | --- | --- | --- |
|  | **Date** | **Medium** | **Conditions** | **# infected IEs** | **# control IEs (+ hygro)** | **control IEs (- hygro)** | **Notes** |
| Transformation & Co-cultivation |  | Co | 25 °C 7d DD |  |  |  |  |
| Resting Culture |  | Res | 30 °C 5d LL |  |  |  |  |
| Selection 1 |  | Sel | 30 °C 10d LL |  |  |  |  |
| Selection 2 |  | Sel | 30 °C 10d LL |  |  |  |  |
| Selection 3 (embryogenic calli) |  | Sel | 30 °C 10d LL |  |  |  |  |
| Pre –regeneration |  | Pre | 30 °C 10d LL |  |  |  |  |
| Regenerating |  | Reg | 30 °C 14d LL |  |  |  |  |
| Plantlets |  | Roo | 27 °C 14d DL |  |  |  |  |

Prepared by: Date:

DD: continuous dark

LL: continuous light

DL: 16h light, 8h dark

**Table S13. GUS staining solution** (wrapped in aluminum foil, keep at 4 °C, in the dark)

|  | **Final concentration** | **For 50 ml** |
| --- | --- | --- |
| 0.5 M EDTA | 10 mM | 1 ml |
| 100 mM phosphate buffer | 50 mM | 25 ml |
| 10% Triton X-100 | 0.1% | 0.5 ml |
| 50 mM potassium ferrocyanide* | 1 mM | 1 ml |
| 50 mM potassium ferricyanide* | 1 mM | 1 ml |
| methanol | 20% | 10 ml |
| 100 mM X-Gluc | 2 mM | 1 ml |
| Sterile water |  | Add up to 50 ml |

**Table S14. X-Gluc solution** (prepare freshly)

|  | **Final concentration** | **For 50 ml staining solution** |
| --- | --- | --- |
| X-Gluc | 100 mM | 50 mg |
| DMSO |  | 1 ml |
